# Supplementary material for: Metformin for the treatment of breast cancer: a scoping review of randomized clinical trials
Source: Research Square preprint supplement (doi:10.21203/rs.3.rs-4593019/v1), 2025-05-07
Supplement: Supplementary file 3 [file 9e585774eeb25929f7886df1.docx]

**Table 2.** Clinical, non-clinical, and miscellaneous outcomes evaluated by the studies included in the Scoping Review

| **Outcomes** | **Studies with at least some published results** | **Studies without published results** |
| --- | --- | --- |
| **Clinical Outcomes** |  |  |
| **Survival** |  |  |
| Overall survival (OS) | MYME Trial (Nanni, 2018); Zhao, 2017; Liubota, 2018; Salah, 2021; Pimentel, 2019; SNCIC CTG MA.32 (Goodwin, 2022) | NCT01477060; BREAKFAST Trial (NCT04248998); ChiCTR1900023487 (Zhang, 2020) |
| Disease-free survival (DFS) | METTEN Trial (Martin-Castillo, 2018); Ahmed, 2021; El-Haggar, 2016; Liubota, 2018; SNCIC CTG MA.32 (Goodwin, 2022) | ChiCTR1900023487 (Zhang, 2020); ChiCTR1900027489 |
| Progression-free survival (PFS) | MYME Trial (Nanni, 2018); Zhao, 2017; Salah, 2021; Pimentel, 2019 | Saif, 2019/Kritharis, 2014; NCT01477060; ChiCTR1900027489 |
| Relapse-free survival (RFS) | SNCIC CTG MA.32 (Goodwin, 2022) | - |
| Distant metastasis-free survival (DMFS) | - | BREAKFAST Trial (NCT04248998) |
| Mortality | - | OPTIMAL Trial (NCT04001725) |
| **Response Rates** |  |  |
| Objective Response Rate (ORR) | Zhao, 2017; METEOR Trial (Kim, 2019); Semiglazova, 2018; Ahmed, 2021; Liubota, 2018; MBC1 Trial (Semiglazova, 2019); MYME Trial (Nanni, 2018) | NeoMET Study (NCT01929811); NCT04387630; Arce-Salinas, 2016; NCT01477060; BREAKFAST Trial (NCT04248998); Salah, 2021; ChiCTR1900023487 (Zhang, 2020) |
| Clinical Benefit Rate (CBR) | Zhao, 2017; Ahmed, 2021; Liubota, 2018; Salah, 2021; Pimentel, 2019 | NeoMET Study (NCT01929811); NCT04387630; Arce-Salinas, 2016; BREAKFAST Trial (NCT04248998); |
| Pathological Compplete Response (pCR) | Arce-Salinas, 2016; Semiglazova, 2018; METTEN Trial (Martin-Castillo, 2018); Ahmed, 2021; Liubota, 2018; Barakat, 2022; MBC1 Trial (Semiglazova, 2019); Azazy, 2020 | ChiCTR-IPR-16008553; NeoMET Study (NCT01929811); METNEO Trial (NCT04170465); METEOR Trial (Kim, 2019); HERMET Trial (NCT03238495); BREAKFAST Trial (NCT04248998) |
| **Breast-related outcomes** |  |  |
| Breast conservation rate (BCR) | METEOR Trial (Kim, 2019); METTEN Trial (Martin-Castillo, 2018); Ahmed, 2021; Liubota, 2018; Barakat, 2022 | NeoMET Study (NCT01929811) |
| Breast density change | METEOR Trial (Kim, 2019); SNCIC CTG MA.32 (Goodwin, 2022) | - |
| Breast cancer–free interval | SNCIC CTG MA.32 (Goodwin, 2022) | - |
| Breast cancer events | - | ChiCTR-IPR-16008553 |
| Clinical resection of lump | - | ChiCTR-IPR-16008553 |
| Prevalence, grade and proliferation of lobular or ductal intraepithelial neoplasia (LIN or DIN) and ductal hyperplasia | Bonanni, 2012/DeCensi, 2015 | - |
| ECOG performance status | - | OPTIMAL Trial (NCT04001725) |
| **Other Clinical outcomes** |  |  |
| Metastasis | El-Haggar, 2016 | - |
| Quality of Life (QoL) | Semiglazova, 2018; Barakat, 2022; MBC1 Trial (Semiglazova, 2019); Pimentel, 2019; SNCIC CTG MA.32 (Goodwin, 2022) | OPTIMAL Trial (NCT04001725); NCT02472353; ChiCTR1900023487 (Zhang, 2020) |
| Toxicity | Saif, 2019/Kritharis, 2014; Azazy, 2020; Sadighi, 2016; MYME Trial (Nanni, 2018); Zhao, 2017; METEOR Trial (Kim, 2019); Semiglazova, 2018; METTEN Trial (Martin-Castillo, 2018); Ahmed, 2021; Barakat, 2022; MBC1 Trial (Semiglazova, 2019); Pimentel, 2019 | NeoMET Study (NCT01929811); METNEO Trial (NCT04170465); NCT02472353; NCT01477060; BREAKFAST Trial (NCT04248998); ChiCTR1900023487 (Zhang, 2020); ChiCTR1900027489 |
| **Non-clinical Outcomes** |  |  |
| **Comorbidities** |  |  |
| Blood pressure levels | Ko, 2015 | - |
| New diagnosis of Diabetes mellitus | SNCIC CTG MA.32 (Goodwin, 2022) | OPTIMAL Trial (NCT04001725) |
| New diagnosis of Metabolic syndrome | - | ChiCTR-IPR-16008553 |
| **Nutrition** |  |  |
| Diet | SNCIC CTG MA.32 (Goodwin, 2022) | - |
| Weight loss | Ko, 2015 | - |
| **Anthropometric Measurements** |  |  |
| Body Mass Index (BMI) | PECAM Study (Davis, 2018); Meyerhardt, 2020/Brown, 2020; SPIRIT Trial (Yeh, 2021); SNCIC CTG MA.32 (Goodwin, 2022); Bonanni, 2012 | - |
| Weight | PECAM Study (Davis, 2018); Meyerhardt, 2020/Brown, 2020; SPIRIT Trial (Yeh, 2021); Ko, 2015 | - |
| Height | Ko, 2015 | - |
| Abdominal circumference | PECAM Study (Davis, 2018) | - |
| Waist circunference | Ko, 2015 | - |
| Waist to Hip Ratio | Meyerhardt, 2020/ Brown, 2020 | - |
| **Fertility** |  |  |
| Endometrial thickness | PECAM Study (Davis, 2018) | - |
| Menstruation recovery rate | - | ChiCTR1900023487 (Zhang, 2020); ChiCTR1900027489 |
| 5-year pregnancy | - | ChiCTR1900023487 (Zhang, 2020); ChiCTR1900027489 |
| **Sex Hormones** |  |  |
| Anti-Müllerian Hormone (AMH) | - | ChiCTR1900023487 (Zhang, 2020); ChiCTR1900027489 |
| Inhibin B | - | ChiCTR1900023487 (Zhang, 2020); ChiCTR1900027489 |
| Estradiol | SNCIC CTG MA.32 (Goodwin, 2022) | ChiCTR1900023487 (Zhang, 2020); ChiCTR1900027489 |
| Progesterone | - | ChiCTR1900023487 (Zhang, 2020); ChiCTR1900027489 |
| Prolactin (PRL) | - | ChiCTR1900023487 (Zhang, 2020); ChiCTR1900027489 |
| Follicle Stimulating Hormone (FSH) | - | ChiCTR1900023487 (Zhang, 2020); ChiCTR1900027489 |
| Luteinizing Hormone (LH) | Reach for Health trial (Patterson, 2018) | ChiCTR1900023487 (Zhang, 2020); ChiCTR1900027489 |
| Testosterone | Reach for Health trial (Patterson, 2018); SNCIC CTG MA.32 (Goodwin, 2022) | ChiCTR1900023487 (Zhang, 2020); ChiCTR1900027489 |
| Sex Hormone-Binding Globulin (SHBG) | Reach for Health trial (Patterson, 2018); SNCIC CTG MA.32 (Goodwin, 2022) | ChiCTR1900023487 (Zhang, 2020); ChiCTR1900027489 |
| **Genetic Tests** |  |  |
| Genomic analysis | - | NCT02472353 |
| mTOR pathway gene expression | PECAM Study (Davis, 2018) | - |
| C Allele of ATM rs11212617 | METTEN Trial (Martin-Castillo, 2018) | - |
| Genes associated with doxorubicin-induced cardiotoxicity at baseline | - | TCTR20200116007 |
| **Bloodtests** |  |  |
| Blood routine | - | ChiCTR1900027489 |
| Urine routine | - | ChiCTR1900027489 |
| Fasting Serum Urate (SU) | SPIRIT Trial (Yeh, 2021) | - |
| Vitamin B12 | SNCIC CTG MA.32 (Lohmann, 2017) | - |
| **Liver function** |  |  |
| Aspartate aminotransferase (AST) | - | ChiCTR1900027489 |
| Alanine aminotransferase (ALT) | - | ChiCTR1900027489 |
| **Kidney function** |  |  |
| Estimated glomerular filtration rate (eGFR) | SPIRIT Trial (Yeh, 2021) | ChiCTR1900027489 |
| **Blood-based energetic biomarkers** |  |  |
| Glucose | PECAM Study (Davis, 2018); Meyerhardt, 2020/Brown, 2020; Ko, 2015; Reach for Health trial (Patterson, 2018) | OPTIMAL Trial) (NCT04001725); ChiCTR-IPR-16008553; |
| Insulin | PECAM Study (Davis, 2018); Meyerhardt 2020/Brown, 2020; SPIRIT Trial (Yeh, 2021); METTEN Trial (Martin-Castillo, 2018); El-Haggar, 2016; Ko, 2015; Reach for Health trial (Patterson, 2018); SNCIC CTG MA.32 (Goodwin, 2022) | ChiCTR-IPR-16008553 |
| Homeostatic Model Assessment for Insulin Resistance (HOMA-IR) | PECAM Study (Davis, 2018); Sadighi, 2016; MYME Trial (Nanni, 2018); El-Haggar, 2016; SNCIC CTG MA.32 (Goodwin, 2022); Bonanni, 2012 | - |
| Hemoglobin A1C (HbA1c) | PECAM Study (Davis, 2018); Sadighi, 2016; MYME Trial (Nanni, 2018); El-Haggar, 2016; SNCIC CTG MA.32 (Goodwin, 2022); Bonanni, 2012 | - |
| IGF1R (Insulin Like Growth Factor 1 Receptor) | MYME Trial (Nanni, 2018); Bonanni, 2012 | - |
| IGF-1 (insulin-like growth factor 1) | Meyerhardt, 2020/Brown, 2020; SPIRIT Trial (Yeh, 2021); El-Haggar, 2016; Bonanni, 2012 | - |
| IGFBP-1 (Insulin-like growth factor-binding protein 1) | Bonanni, 2012 | - |
| IGFBP-3 (Insulin-like growth factor binding protein 3) | El-Haggar, 2016; Bonanni, 2012 | - |
| IGF1:IGFBP3 molar ratio | SPIRIT Trial (Yeh, 2021); El-Haggar, 2016 | - |
| **Cardiac-related outcomes** |  |  |
| LVEF (Left Ventricle Ejection Fraction) | - | NCT02472353 |
| Troponin-I level | - | TCTR20200116007; NCT02472353 |
| BNP (Brain natriuretic peptide) | - | NCT02472353 |
| Glutathione | - | NCT02472353* |
| Cardiac function |  | TCTR20200116007 |
| Cardiovascular hospitalizations | SNCIC CTG MA.32 (Goodwin, 2022) | - |
| **Inflammation measures** |  |  |
| hs-CRP (high sensitivity C-reactive protein) | Meyerhardt, 2020/Brown, 2020; SPIRIT Trial (Yeh, 2021); Reach for Health trial (Patterson, 2018); SNCIC CTG MA.32 (Goodwin, 2022); Bonanni, 2012 | - |
| sTNF-αR2 (soluble tumor necrosis factor alpha receptor 2) | Meyerhardt, 2020/ Brown, 2020 | - |
| IL-6 (interleukin 6) | Meyerhardt, 2020/ Brown, 2020; SPIRIT Trial (Yeh, 2021); | - |
| Absolute counts of immune cell populations | - | OPTIMAL Trial (NCT04001725) |
| Relative counts of immune cell populations | - | OPTIMAL Trial (NCT04001725) |
| Activation status of immune cell populations | - | OPTIMAL Trial (NCT04001725) |
| Systemic inflammatory parameters | - | OPTIMAL Trial (NCT04001725) |
| **Tumor Biomarkers** |  |  |
| Ki67 | Sadighi, 2016; METEOR Trial (Kim, 2019); Semiglazova, 2018; NeoMet Trial (Hadad, 2011/Hadad, 2015); METTEN Trial (Martin-Castillo, 2018); Bonanni, 2012 | METNEO Trial (NCT04170465); SETUP AIM Trial (ACTRN12612000416897); MetBreCS Trial (EUCTR2015-001001-14-IT) |
| CA-153 | El-Haggar, 2016; SNCIC CTG MA.32 (Goodwin, 2022) | - |
| Caspase-3 | NeoMet Trial (Hadad, 2011/Hadad, 2015) | METNEO Trial (NCT04170465) |
| T-cell cytotoxic markers | - | NCT04387630 |
| HER2-related pathways | METTEN Trial (Martin-Castillo, 2018) | - |
| **Liquid Biopsy** |  |  |
| Circulating Tumor Cells (CTC) | MYME Trial (Nanni, 2018) | - |
| **Imaging responses** |  |  |
| Mammogram | - | SETUP AIM Trial (ACTRN12612000416897) |
| Ultrasound | - | SETUP AIM Trial (ACTRN12612000416897) |
| Magnetic Resonance Imaging (MRI) | - | SETUP AIM Trial (ACTRN12612000416897) |
| **Cell signalling** |  |  |
| pAMPK and pAkt | NeoMet Trial (Hadad, 2011/Hadad, 2015); METTEN Trial (Martin-Castillo, 2018) | - |
| AMPK phosphorylation |  | NCT02472353 |
| mTOR | METTEN Trial (Martin-Castillo, 2018) | - |
| **Miscellaneous outcomes** |  |  |
| Adiponectin | Bonanni, 2012 | NCT02472353 |
| Lipid peroxidation |  | NCT02472353 |
| Leptin | Meyerhardt, 2020/Brown, 2020; SNCIC CTG MA.32 (Goodwin, 2022) | - |
| Lipids profile | Ko, 2015 | OPTIMAL Trial (NCT04001725) |
| Aminoacid profile | - | OPTIMAL Trial (NCT04001725) |
| Mitochondria function | - | TCTR20200116007 |
| Brain local control rate of disease | - | OPTIMAL Trial (NCT04001725) |
| Neuropathy | - | NCT02360059 |
| Feasibility | IBIS 3 Trial (Oke, 2017) | - |
| DLT (dose limiting toxicity) | Saif, 2019/Kritharis, 2014 | - |
| PD (Pharmacodynamic markers) | Saif, 2019/Kritharis, 2014 | - |
| BDI (Beck depression inventory) | Ko, 2015 |  |
| 5 cognitive domains | Reach for Health trial (Patterson, 2018) | - |
| Glucocorticoids-induced changes in gut microbiota populations | - | OPTIMAL Trial (NCT04001725) |
| Metformin-induced changes in gut microbiota populations | - | OPTIMAL Trial (NCT04001725) |
| **Not specified miscellaneous outcomes** |  |  |
| Not specified circulating and molecular biomarkers | - | MetBreCS Trial (EUCTR2015-001001-14-IT) |
| Not specified metabolomic analysis | - | MetBreCS Trial (EUCTR2015-001001-14-IT) |
| Not specified gene expression profile in adipose and epithelial breast tissue | - | MetBreCS Trial (EUCTR2015-001001-14-IT) |
| Not specified assessment of epigenetic changes in methylome patterns (DNA methylation) | - | MetBreCS Trial (EUCTR2015-001001-14-IT) |
