# Supplementary material for: Metformin for the treatment of breast cancer: a scoping review of randomized clinical trials
Source: Research Square preprint supplement (doi:10.21203/rs.3.rs-4593019/v1), 2025-05-07
Supplement: Supplementary file 6 [file cac8dc4ff4c9f3d21f59c77e.docx]

**Table 1**: Main characteristics of the 25 included studies with some form of published results.

| **Study name / First author / Year** | | **Participants** | **Cancer (type, stage, treatment modality)** | **Intervention and Comparator** | | **Outcomes** | **Main Results** | |
| --- | --- | --- | --- | --- | --- | --- | --- | --- |
| **Studies with Results Published as Full Text Articles** | | | | | | | | |
| Ahmed, 2021 | | 50 women with breast cancer  No data on: diabetes, obesity, overweight, metabolic syndrome, and physical activity  Menopausal status: Pre-menopause: 34 (68%); Post-menopause: 14 (28%) | **Phenotype**:  34 (68%) with luminal; 10 (20%) with HER2+; 6 (12%) with triple negative breast cancer (TNBC)  **Stage**:  80% with stage IIIA and 16% with stage IIIB  **Treatment Modality**: neoadjuvant | **Interventions**: Standard neoadjuvant Adriamycin-Paclitaxel plus Metformin 500mg twice/day until the time of surgery  **Comparator**: standard neoadjuvant Adriamycin-Paclitaxel until the time of surgery | | **Primary**:  Pathological Complete Response (pCR) in the axilla and breast postoperatively  **Secondary**:  clinical response, method of surgery, toxicity, and Disease-free survival (DFS) | **pCR:**  Metformin group: 15 (60%)  Control group: 9 (36%)  p = 0.08  **Clinical response** (total clinical staging remission post neoadjuvant chemotherapy):  Metformin group: 76%  Control group: 60%  p = 0.39  **Method of surgery:**  - Modified radical mastectomy: Metformin group: 19 (76%)  Control group: 23 (92%)  - Conservative surgery:  Metformin group: 6 (24%)  Control group: 2 (8%)  p = 0.25  **DFS** (2-year DFS)**:**  Metformin group: 91.3%  Control group: 96.3%  p = 0.57  **Radiological response:**  “All patients achieved either complete remission or regressive disease”.  **Toxicity:**  No differences in grade ≥3 adverse events between groups. | |
| EL-Haggar, 2016 | | A total of 148 women were eligible for the study. 129 women were randomized  No data on: obesity, overweight, menopausal status, physical activity, and metabolic syndrome  100% nondiabetic women | **Phenotype**:  Luminal: 86 (84.3%); Basal like: 10(9.8%); HER2 enriched: 6 (5.9%)  **Stage**:  Stage I: 16 (15.7%) Stage II: 33 (32.4%) Stage III: 53 (51.96%)  **Treatment Modality**: adjuvant | **Interventions**: adjuvant therapy (chemotherapy treatment [CT] + hormonal therapy [HT]) + metformin treatment (850 mg of metformin twice daily) + Vitamin B12 (every 3 days)  **Comparator**:  adjuvant therapy (CT + HT) and Vitamin B12 (every 3 days) | | **Primary**:  DFS  **Secondary**:  Insulin-like Growth Factor (IGF)-1, Insulin-like Growth Factor Binding Protein (IGFBP)-3, IGF- 1: IGFBP-3 molar ratio, insulin, fasting blood glucose (FBG), Homeostasis Model Assessment of Insulin Resistance (HOMA-IR), Cancer Antigen 15-3 (CA 15-3) and metastasis | **DFS:**  Metformin group: [mean survival time = 24.9 months, 95% confidence interval (CI): 24.1 to 25.7] (p = 0.04)  Control group: [mean survival time = 22.8 months, 95%CI: 21.2 to 24.4]  After adjusting for age, tumor stage, adjuvant chemotherapy, ER and HER2 status, control women were significantly more (p = 0.023) likely to develop metastasis than those treated with metformin [Hazard Ratio (HR) = 3.27, 95%CI: 1.17 to 9.06] | |
| Ko, 2015 | | 105 women with breast cancer.  No data on: metabolic syndrome  Diabetes: 1%  Obese/overweight: 100%  Menopause: 85% a 88%  Regular exercise: 51% to 69% | **Phenotype**:  17% HER2+;  62% luminal;  16% triple negative; 5% not specified  **Stage**:  36% of patients were stage 0 or 1  **Treatment Modality**: adjuvant | **Interventions**:  Metformin 500 mg/d group: Received metformin 500 mg dose once daily for 2 weeks and then placebo was added to that regimen for 22 weeks.  Metformin 1000 mg/d group: Received metformin 500 mg dose once daily for 2 weeks and then the dose was escalated to 500 mg twice daily for 22 weeks.  **Comparator**: Placebo | | **Primary**: Weight loss  **Secondary**: FBG, glycated hemoglobin (HbA1c), insulin levels; total cholesterol, HDL and LDL-cholesterols, and triglyceride levels; Anthropometry (i.e., weight, height, BMI, waist circumference, and blood pressures) and body composition. Beck depression inventory (BDI). | **Weight loss (kg):**  Metformin 500 mg group [mean (Standar Error (SE)]: -0.5 (0.3)  Metformin 1000 mg group: - 0.6 (0.2)  Placebo group: -1.1 (0.3)  p = 0.22  **Glucose (mg/dL):**  Metformin 500 mg group: 88.9 (1.4)  Metformin 1000 mg group: 88.7 (2.3)  Placebo group: 90.6 (1.0)  p = 0.79  **Insulin (µIU/mL):**  Metformin 500 mg group: 8.3 (0.4)  Metformin 1000 mg group: 7.2 (0.3)  Placebo group: 8.1 (0.4);  p = 0.57  **HbA1c (%):**  Metformin 500 mg group: 5.84 (0.04)  Metformin 1000 mg group: 5.68 (0.07)  Placebo group: 5.82 (0.05)  p = 0.75  **Total cholesterol (mg/dL):**  Metformin 500 mg group: 193.2 (6.0)  Metformin 1000 mg group: 190.1 (5.5)  Placebo group: 188.4 (7.1)  p = 0.91  **BMI (kg/m2):**  Metformin 500 mg group: 26.5 (0.5)  Metformin 1000 mg group: 26.9 (0.5)  Placebo group: 26.9 (0.5)  p = 0.50  **Waist (cm):**  Metformin 500 mg group: 86.8 (1.3)  Metformin 1000 mg group: 87.4 (1.1)  Control group: 84.2 (1.3)  p = 0.32  **Beck depression inventory (BDI):**  Metformin 500 mg group: 10.3 (1.0)  Metformin 1000 mg group: 10.5 (1.0)  Placebo group: 10.4 (1.3)  p = 0.81 | |
| PECAM Study  (Davis, 2018) | | 105 women with breast cancer.  No data on: obesity, overweight, physical activity, and metabolic syndrome.  100% postmenopausal women  100% nondiabetic women | **Phenotype**:  100% ER+/ PR+ (inclusion criteria)  **Stage**:  stage I/II  **Treatment Modality**: adjuvant | **Interventions**:  The metformin dose was titrated over three weeks from 425mg at night to 850mg twice a day.  **Comparator**:  Placebo will be identical tablets to the metformin 850mg tablets. | | **Primary:**  Endometrial Thickness (ET)  **Secondary**:  Clinical characteristics (BMI, weight, waist circumference) and biochemistry (FBG, fasting insulin, HOMA-IR). | **ET:**  Metformin group [median (range)]: 2.3 mm (1.4 to 7.8)  Placebo group [median (range)]: 3.0 mm (1.2 to 11.3)  p = 0.05  **BMI change:**  Metformin group [median (range)]: -0.58 (-2.96 to 1.37)  Placebo group [median (range)]: 0.52 (-2.27 to 2.90)  p < 0.001  **Weight change (Kg):**  Metformin group [median (range)]: -1.7 (-8.4 to 3.7)  Placebo group [median (range)]: 1.5 (-6.1 to 7.4)  p < 0.001  **Waist circumference change (cm):**  Metformin group [median (range)]: -1 (-13 to 5)  Placebo group [median (range)]: 1 (-12 to 14)  p = 0.06  **FBG change (mmol/L):**  Metformin group [median (range)]: -0.25 (-1.3 to 0.6)  Placebo group [median (range)]: 0.0 (-0.5 to 0.7)  p < 0.001  **Insulin change (μU/mL):**  Metformin group [median (range)]: -0.5 (-7.9 to 4.5)  Placebo group [median (range)]: 0.5 (-2.7 to 9.8)  p < 0.01  **HOMA-IR change:**  Metformin group [median (range)]: -0.17 (-2.17 to 0.96)  Placebo group [median (range)]: 0.14 (-0.71 to 2.48)  p < 0.001 | |
| Liubota, 2018 | | 72 women included  No data on: physical activity and diabetes.  100% obese and 100% with metabolic syndrome  Premenopausal status: 12 (16,7%);  Postmenopausal status: 60 (83,3%);  Hypertension: 39 (54,2%); Hyperlimidemial: 61 (84,7%). | **Phenotype**:  Luminal: 52 (72,22%);  HER2+: 6 (8,33%); TNBC: 14 (19,44%)  **Stage**:  Stage II: 35 (48,61%);  Stage III: 37 (51,39%);  **Treatment Modality**: neoadjuvant | **Interventions**:  500 mg metformin 30 minutes before meal, three times a day with standard neoadjuvant treatment  **Comparator**:  standard neoadjuvant treatment | | **Primary:**  Clinical Response Rate [Complete Clinical Response (cCR), Partial Clinical Response (cPR), Clinical Stable Disease (cSD) and Clinical Progressive Disease (cPD)] and pCR.  **Secondary**:  Type of surgery performed,  DFS, Overall survival (OS) | **Clinical Response Rate**:  Overall clinical response rate (cCR + cPR)  Metformin group: 28 (77,5%) Control group: 9 (25%)  p < 0,05  **Pathological complete response**:  Metformin group: 9 (26,5%) Control group: 2 (6%)  p < 0.05  **Type of surgery performed**:  - Breast-conserving surgery: Metformin group: 9 (50%)  Control group: 4 (23,5%)  p < 0.05  - Radical mastectomy:  Metformin group: 7 (38%)  Control group: 13 (76.5%)  **DFS** (5-year DFS)**:**  Metformin group: 57%  Control group: 58%  p = 0.79  **OS** (5-year OS):  Metformin group: 76%  Control group: 59%  p = 0.67 | |
| Salah, 2021 | | 50 women included  No data on: obesity/overweight, physical activity and  metabolic syndrome  Pre-menopausal: 22 (44%)  Post-menopausal: 28 (56%)  100% nondiabetic women | **Receptors**:  Overall HER 2: HER2-: 36 (72%); HER2+: 14(28%).  Overall HR: ER/PR-: 10 (20%); ER/PR+=40 (80%)  **Stage**:  100% stage IV  **Treatment Modality**: adjuvant | **Interventions**: Standard chemotherapy plus metformin 1 g twice daily (2g/day)  **Comparator**:  Standard chemotherapy | | **Clinical outcomes:**  **Primary:**  Radiologic Response Rate  **Secondary:**  OS and progression-free survival (PFS) | **Radiologic Response Rate:** Women in metformin group had significantly better radiologic response rate than women in the control group (p = 0.002)  **OS:**  Metformin group [mean OS]: 5.8 months  Control group [mean OS]: 5.3 months  (HR = 0.57, 95%CI: 0.24 to 1.3)  **PFS:**  Metformin group [mean PFS]: 5.1 months  Control group [mean PFS]: 4.4 months  (HR = 0.311, 95%CI: 0.063 to 1.5) | |
| Barakat, 2022 | | 80 women included; (74 randomized)  No data on: physical activity and metabolic syndrome.  Obesity: 32 (43,2%)  Overweight: 26 (35,1%)  Premenopause: 38 (51,4%)  Postmenopause: 36 (48,7%)  100% nondiabetic | **Phenotype**:  Luminal A: 30 (40,54%)  Luminal B/HER2-: 8 (10,81%)  Luminal B/HER2+: 25 (33,78%)  HER2+/non-luminal: 5 (6,76%)  TNBC: 6 (8,11%)  **Stage**:  IIB: 10 (13,51%)  IIIA: 31 (41,89%)  IIIB: 33 (44,59%)  **Treatment Modality**: neoadjuvant | **Interventions**:  Standard Neoadjuvant Chemotherapty (NACT) (4 cycles doxorubicin 60 mg/m2/ cyclophosphamide 600 mg/m2, followed by 12 cycles of weekly paclitaxel 80 mg/m2) + Metformin (1000 mg twice daily) followed by surgery  **Comparator**:  Standard NACT only followed by surgery. | | **Primary:**  Objective response rate (ORR), cCR and pCR  **Secondary:**  Breast conservative rate (BCR), safety profile and tolerability and quality of life (QoL) | **ORR:**  Metformin group: 29 (80.6%)  Control group: 26 (64.4%)  (OR = 1.91, 95%CI: 0.66 to 5.59, p = 0.24)  **cCr:**  Metformin group: 10 (27.8%)  Control group: 4 (10.5%)  (OR = 3.27, 95%CI: 0.92 to 11.60, p = 0.06)  **pCR:**  Metformin group: 8 (22.2%)  Control group: 4 (10.5%)  (OR = 2.43, 95%CI: 0.66 to 8.91, p = 0.18)  **BCR:**  Metformin group: 7 (19.4%)  Control group: 5 (13.2%)  (OR = 1.59, 95% CI: 0.46 to 5.57, p = 0.47)  **QoL:**  QoL was similar in the metformin and control groups across different QoL domains  **Safety and tolerability:**  Grade I and II gastrointestinal symptoms were more common in the metformin group but chemotherapy-induced peripheral neuropathy was less common in the metformin group than in the control group. | |
| Zhao, 2017 | | 60 patients  No data on: obesity, overweight, physical activity, diabetes, and metabolic syndrome.  100% postmenopausal | **Phenotype**:  Luminal = 60 (100%);  **Receptors**:  100% HR+ (ER and/or PR), 100% HER-  **Stage**:  Stage III and IV: 60 (100%)  **Treatment Modality**: adjuvant and palliative | **Interventions**:  aromatase inhibitor (exemestane 25mg/d or letrozole 2.5mg/d depending on the most recent treatment) plus metformin (0.5g bid, orally)  **Comparator**:  Aromatase inhibitor (letrozole or exemestane) + placebo | | **Clinical outcomes:**  **Primary:**  PFS  **Secondary:**  ORR, Clinical Benefit Rate (CBR), OS and tolerability | **PFS:**  HR = 1.2, 95%CI: 0.7 to 2.1, p = 0.48.  **ORR:**  Metformin group: 6.7% (95%CI: 0.3 to 16)  Control group: 0% (95%CI: not available)  p = 0.99  **CBR:**  Metformin group: 33.3% (95%CI: 15 to 51)  Control group: 50.0% (95%CI: 31 to 69)  (OR = 0.50, 95%CI: 0.2 to 1.4, p = 0.15)  **OS:**  HR = 1.1, 95%CI: 0.5 to 2.4, p = 0.81.  **Tolerability:**  No substantial difference in incidence or severity of adverse events was seen between the two treatment groups. | |
| METEOR Trial  (Kim, 2019) | | 203 women were randomized. 153 intention-to-treat population were analyzed (72 metformin 75 placebo group).  No data on: obesity, overweight, physical activity, and metabolic syndrome.  100% postmenopausal  100% nondiabetic | **Phenotype**:  Luminal = 203 (100%);  **Receptors**:  ER+ = 203 (100%)  **Stage**:  100% stages II/III. There is no information on specific frequencies for stage II and stage III separately.  **Treatment Modality**: neoadjuvant | **Interventions**:  Metformin (2000mg/day) + Letrozole (2.5mg/day)  **Comparator**:  Placebo + Letrozole (2.5mg/day) | | **Primary:**  clinical response rate (CRR)  **Secondary:**  pCR, breast conservation rate, breast density change, Ki67(%) and toxicity | **CRR:**  Metformin group: 66.7%  Control group: 56.4%  p = 0.19  **pCR:**  Not reported  **Breast conservation rate:** Metformin group: 66.7%  Control group: 69.3%  p > 0.05  **Breast density change:**  Not reported  **Ki67 (%)**  Neither Ki67% nor PEPI score was different between the two groups. However, among the 20 patients with core-needle biopsy after 4 weeks of medication, greater number ofpatients displayed Ki67 < 10% in the metformin group than in the placebo group (87.5% versus 33.3%, p = 0.017) | |
| MBC1 Trial  (Semiglazova, 2019) | | 53 patients were included in the study.  No data regarding: obesity, overweight, menopause status, physical activity, and metabolic syndrome.  100% nondiabetic | **Phenotype**:  Luminal, HER2, Triple negative  **Receptors**:  ER+/HER2-(68%); ER+/HER2+ (25%);  ER-/HER2- (7%);  **Stage**:  stage IIB, IIIA,IIIB,IIIC (frequency not reported)  **Treatment Modality**: neoadjuvant | **Interventions**:  FDC x 6 cycles once every 21 days with metformin 850 mg BID  **Comparator**:  conventional chemotherapy (FDC) | | **Primary:**  ORR and pathomorphological response (pR)  **Secondary:**  Adverse events and QoL | **ORR:**  Metformin group: 75%  Control group: 85%  **pR**:  Metformin group compared to control group: OR = 0.602, 95%CI: 0.085 to 4.284, p = 0.612.  **Adverse events:**  Not reported  **QoL:**  Not reported | |
| Semiglazova, 2018 | | 54 patients (recruiting)  No data regarding: physical activity, and metabolic syndrome.  Obesity: 23 (42%)  Overweight: 15 (28%)  100% menopause  100% nondiabetic | **Phenotype**:  Luminal  **Receptors**:  54 (100%) ER+  **Stage**:  stage IIB, IIIA, IIIB, IIIC  (frequency not reported)  **Treatment Modality**: neoadjuvant | **Interventions**:  Arm 3: Toremifene (TOR) 120 mg daily with metformin (MTF) 850 mg  BID  **Comparator**:  Arm 1: 120 mg of oral toremifene (TOR) daily;  Arm 2: Toremifene (TOR) 120 mg daily with 3mg overnight melatonin | | **Primary:**  Ki67 index  **Secondary:**  ORR, pR (tumor and lymph nodes), adverse events and QoL | **Ki67 (decreased level)**:  Metformin group: 74%  Control group: 42%  RR = 4.23, 95%CI: 1.044 to 17.139, p = 0.043  **Objective Response Rate:**  Metformin group: 47.3%  Control group: 31.6%  RR not reported  **pR:** A complete pR in the tumor and lymph nodes was not achieved in any patient.  **Adverse events:**  Not reported    **QoL:** There was not reduce the quality of life of patients | |
| Reach for Health trial  (Patterson, 2016; Patterson, 2018; Hartman, 2019) | | 333 participants  No data regarding: diabetes and metabolic syndrome.  Comorbidities:  High blood pressure=166(49.9%); High cholesterol: 164 (49.3%);  Previous smoking+current smoking= 149 (44,7%);  Any current alcohol intake= 225 (67.6%)  Phisical activity: median (Q1–Q3): 16.0 (2.7–42.0) Metabolic Equivalent Task (MET) hours per week (self-report)  100% overweight/obese  100% postmenopausal | **Phenotype**:  ER+ or PR+ HER2- (Luminal): 240 (72.1%); HER2+: 51 (15.3%);  Triple-negative (ER-, PR-, HER2-): 30 (9.0%); Missing data: 12 (3.6%)  **Stage**:  Stage I: 161 (48.4%);  Stage II: 116 (34.8%);  Stage III: 56 (16.8%)  **Treatment Modality**:  prevention of recurrence after end of cancer treatment | **Interventions**:  Metformin only (1500 mg/day) and Weight loss & Metformin  **Comparator:**  Placebo only and Weight loss & placebo | | **Primary:**  Fasting insulin, glucose, C-reactive protein (CRP), estradiol, testosterone, and sex-hormone binding globulin (SHBG)  **Secondary:**  Weight and five cognitive domains (exploratory outcome) | **Insulin (pg/mL) change*:**  –7.88, 95%CI: –15.01 to –0.76, p = 0.03  **Glucose (mg/dL) change*:**  –1.27, 95%CI: –3.39 to 0.85, p = 0.24  **C-reactive protein (mg/L) change*:**  –14.87, 95%CI: –32.88 to 3.15, p = 0.10  **Estradiol (pg/mL) change*:**  –9.98, 95%CI: –18.45 to –1.51, p = 0.02  **Testosterone (ng/dL) change*:**  –9.49, 95%CI: –15.20 to –3.77, p = 0.001  **SHBG (nmol/L) change*:**  7.5, 95%CI: 2.43% to 12.57, p = 0.004  **Geometric mean weight (Kg) change***  –2.46, 95%CI: –3.59 to –1.34, p< 0.001  **Cognitive domains change (follow up-baseline):**  Difference between metformin and control group:  Visual spatial: 1.67, 95%CI:-0.92 to 4.25, p = 0.205  Verbal function: -1.58, 95%CI: -4.90 to 1.74, p = 0.351  Memory: 0.67, 95%CI: -1.09 to 2.43, p = 0.454  Executive function: 1.12, 95%CI: -1.20 to 3.44, p = 0.342  Attention: 0.70, 95%CI: -1.03 to 2.44, p = 0.425  *percent change in metformin group minus placebo group | |
| NeoMet Trial  (Hadad, 2011; Hadad, 2015) | | 47  No data regarding: obesity, overweight, physical activity, and metabolic syndrome.  Pre- and peri-menopausal: 2 (14.3%)  Post-menopausal: 12 (85.7%)  100% nondiabetic | **Phenotype**:  Luminal A and Luminal B  **Receptors**:  ER+: 11 (78.57%);  PR+: 11 (78.57%);  HER+: 2 (14.28%)  **Stage**:  stage I or II  **Treatment Modality**:  neoadjuvant | **Interventions**:  metformin 2000 mg  **Comparator:**  No treatment | | Ki67 index, insulin, gene array data, PDE3B and p53, ingenuity pathway analysis, gene set analysis, pAMPK, pAkt, insulin receptor signaling and caspase 3  Note: no clear information about which were the primary and the secondary outcomes. | **Ki67** (Mean percentage change of cells staining for Ki67: preoperative-baseline)**:**  Metformin group: -3.4 (p = 0.027)  Control group: -0.03 (p = 0.455)  **Insulin** (Mean percentage change: preoperative-baseline)**:**  Metformin group: 0.87 (p = 0.663)  Control group: 13.75 (p = 0.044)  **Gene array data**  Not reported to randomized groups  **PDE3B and p53**  Not reported to randomized groups  **Ingenuity pathway analysis**  Not reported to randomized groups  **Gene set analysis**  Not reported to randomized groups  **pAMPK (allred)** (score change baseline to preoperative)  Metformin group: from 5.18 to 6.45, p = 0.04  Control group: from 5.64 to 6.00, p = 0.492  **pAkt (allred)** (score change baseline to preoperative)**:**  Metformin group: from 5.91 to 5.00, p = 0.043  Control group: from 4.91 to 5.18, p = 0.517  **Insulin receptor signaling (mmol/L) (allred)** (score change baseline to preoperative)**:**  Metformin group: from 4.9 to 4.4, p = 0.363  Control group: from 4.09 to 4.36, p = 0.431  **Caspase-3 (%)** (percentage of cancer cell stained preoperative-baseline)**:**  Metformin group: -0.292, p = 0.0437  Control group: -0.146, p = 0.371  PS: None of the changes in the biomarkers were associated with the patient’s BMI either using BMI as a continuous variable or with a cut off of 26 or 30. | |
| Meyerhardt, 2020; Brown, 2020 | | 139 (87 with breast cancer; 52 with colorectal cancer)  (62,6% BC/37,4% CRC)  No characteristics were presented for breast cancer only.  No data regarding: obesity, overweight, menopause status, physical activity, and metabolic syndrome.  100% nondiabetic | **Phenotype**:  NI  **Stage**:  stage I to stage III  **Treatment Modality**: adjuvant | **Interventions**:  Start: 850mg daily for 2 weeks. After: 850mg twice daily for 3 months. PS: If dose escalation was not tolerated, participants remained on 850mg daily for the 12-week intervention  **Comparator**:  educational information on nutrition and two supervised sessions with an exercise physiologist | | **Primary:**  Fasting insulin  **Secondary:**  IGF-1, IGFBP-1, IGFBP-3, leptin, fasting glucose, weight, BMI, waist to hip ratio, high sensitivity CRP (hs-CRP), soluble tumor necrosis factor alpha receptor 2 (sTNF-αR2) and interleukin 6 (IL-6). | No results were reported for breast cancer only. | |
| SPIRIT Trial  (Yeh, 2021; Hu, 2021) | | 121 participants  Participants were cancer survivors with overweight or  obesity.  It was included different malignant solid tumors (breast=68).  No data regarding: menopause status, physical activity, diabetes, and metabolic syndrome.  100% overweight or obesity | **Phenotype**:  No information was reported specifically for breast cancer.  **Stage**:  No information was reported specifically for breast cancer.  **Treatment Modality**: prevention of recurrence after end of cancer treatment | **Interventions**:  Metformin 2000 mg/day. Dosing can be flexible, two or three times per day with meals as tolerated for 12 months.  **Comparator**:  Two arms: Coach directed weight loss; Self-directed weight loss | | **Primary:**  IGF-1 (6-month)  **Secondary:**  IGF-1 (12 months), IGF-1: IGFBP3 molar ratio (6 and and 12 months), weight, BMI, fasting insulin, HbA1c, IL-6, and hs-CRP**,** fasting Serum Urate (SU), Glomerular Filtration Rate (eGFR) and BMI. | No results were reported for breast cancer separately. | |
| Saif, 2019; Kritharis, 2014 | | A total of 100 patients of both sexes were enrolled (52 in delayed arm *vs*. 48 concurrent arm)  It was included 16 different solid tumor types (breast=11).  No data regarding: obesity, overweight, menopause status, physical activity, diabetes, and metabolic syndrome. | **Phenotype**:  NI  **Stage**:  NI  **Treatment Modality**: adjuvant | **Interventions**:  metformin 500 mg twice daily (1g daily) with chemotherapy  **Comparator**:  chemotherapy alone (Stage 1 of study) | | **Primary:**  Dose limiting toxicity (DLT) (Stage 1 of study: when metformin was added to chemotherapy)  **Secondary:**  Adverse events, tumor responses, PFS and pharmacodynamic markers | No results were reported for breast cancer separately. | |
| MYME Trial | Nanni, 2018 | 126 participants  21 (17%) obese  50 (41%) overweight  100 (82%) post-menopausal  100% nondiabetic | **Phenotype**:  Luminal  **Receptors**:  ER+: 106 (87%);  PgR+: 87 (71%);  HER2-: 100%  **Stage**:  Stage IV: 126 (100%)  **Treatment line:**  100% first line chemotherapy  **Treatment modality**: palliative | **Interventions**:  Metformin 2000 mg/day + First-line chemotherapy alone (NPLD + cyclophosphamide)  **Comparator**:  First-line chemotherapy alone (NPLD + cyclophosphamide) | | **Primary:**  PFS  **Secondary:**  OS, ORR, PFS as function of HOMA Index levels, ORR as function of HOMA Index levels, OS as function of HOMA Index levels and Toxicity. | **PFS:**  Metformin group (median PFS): 9.4 months, 95%CI: 7.8 to 10.4  Control group (median PFS): 9.9 months, 95%CI: 7.4 to 11.5  (HR = 1.09, 95%CI: 0.75 to 1.58, p = 0.653)  **OS:**  Metformin group (median OS): 34.4 months, 95%CI: 19.3 to 37.2  Control group (median OS): 26.8 months, 95%CI: 19.4 to 37.9  (HR: 0.81, 95%CI: 0.50 to 1.30, p = 0.382)  **ORR:**  Metformin group: 48%, 95%CI: 32.0 to 63.5  Control group: 49%, 95%CI: 34.1 to 63.9, p = 0.901  **PFS as function of HOMA Index levels:**  HOMA Index <2.5 group, median PFS: 10.4 months, 95%CI: 9.6 to 11.7  HOMA Index ≥ 2.5 group, median PFS: 8.5 months, 95%CI: 5.8 to 9.7  (HR = 1.51, 95%CI: 1.03 to 2.20, p = 0.034)  **OS as function of HOMA Index levels:**  HOMA Index <2.5 group (median OS): 30.8 months, 95%CI:19.4 to 41.4  HOMA Index ≥ 2.5 group (median OS): 27.2 months, 95%CI:19.3 to 37.0  (HR = 0.97, 95%CI: 0.61 to 1.55, p = 0.900)  **ORR as function of HOMA**:  Not reported  **Toxicity:**  Neutropenia grade 3/4:  Metformin group: 54%  Control group: 72%  (p= 0.019)  Febrile neutropenia:  Metformin group: 1 patient  Control group: 6 patients  (p = 0.076)  Diarrhea:  Metformin group: 8%  Control group: 0%  (p = 0.014)  There was no  clinical evidence of cardiotoxicity in either arm. | |
| TransMYME Trial  Gennari, 2020 | 126 participants  (TransMYME study population =72)  100% nondiabetic | **Phenotype**:  Luminal  **Receptors**:  ER+: 106 (87%);  PgR+: 87 (71%);  HER2-: 100%  **Stage**:  Stage IV: 126 (100%)  **Treatment line:**  100% first line chemotherapy  **Treatment modality**:  palliative | | **Interventions**:  Metformin 2000 mg/day + First-line chemotherapy alone (NPLD + cyclophosphamide)  **Comparator**:  First-line chemotherapy alone (NPLD + cyclophosphamide) | **TransMYME trial:**  prognostic role of insulin-like growth factor-1 receptor (IGF-1R) expression on circulating tumor cells (CTC) and prognostic role of CTC count and IGF-1R was assessed for PFS and OS | | No interaction was detected between metformin treatment and the number of CTC or with the expression of IGF-1R on such cells in relation to PFS (p = 0.322) or OS (p = 0.840). There was no effect of metformin treatment on the evolution of the number of CTC or the expression of IGF-1R over time.  [These results were described only in a narrative form, without presenting the exact quantitative results]. | |
| METTEN Trial | Martin-Castillo, 2018 | 84 patients were randomized, but results were presented to patients who received at least one dose of study medication (n=79).  100% not obese (exclusion criteria: BMI>30)  Overweight:  Metformin group: 17 (44.7%)  Control group: 21 (51.2%)  Postmenopausal  Metformin group: 14 (36.8%)  Control group: 17 (41.5%)  Premenopausal  Metformin group: 24 (63.2%)  Control group: 24 (58.8%)  100% nondiabetic  No data regarding: physical activity and metabolic syndrome. | **Phenotype**:  HER2  **Receptors**:  **ER/PgR+**  Metformin group: 19 (50.0%)  Control group: 24 (58.5%)  **ER/PgR-:**  Metformin group: 19 (50.0%)  Control group: 17 (41.5%)  **Stage**:  Stage II - III  **Treatment modality**:  neoadjuvant | | **Interventions**:  Metformin 1.700 mg/day (850 mg BID) for 24 weeks concurrently with 12 cycles of weekly paclitaxel plus trastuzumab, followed by four cycles of 3-weekly fluorouracil, epirubicin, cyclophosphamide (FE75C) plus trastuzumab.  **Comparator**:  Only equivalent sequential chemotherapy plus trastuzumab (paclitaxel plus trastuzumab, followed by fluorouracil, epirubicin, cyclophosphamide plus trastuzumab). | **Primary:**  pCR  **Secondary:**  Tolerability and safety profile (including cardiac toxicity), the rate of breast conservation, 5-year DFS, the inhibition of tumor tissue biomarkers (including proliferative, mTOR/AMPK and HER2-related pathways), and changes in circulating levels of insulin and metabolites | | **pCR (per protocol):**  Metformin group: 65.5% had a pCR (95%CI: 47 to 80)  Control group: 58.6% had a pCR (95%CI: 41 to 74)  (OR = 1.34, 95%CI: 0.46 to 3.89, p = 0.588).  **Cardiac toxicity (left ventricular ejection fraction):**  Metformin group (median change from baseline): –4.0%, 95%CI: –6.0 to –1.8 (end of treatment)  Control group (median change from baseline):  –5.0%, 95%CI: –7.5 to –1.0 (end of treatment)  (p = 0.409)  **Rate of breast conservation (per protocol):**  Metformin group: 79.3% of breast-conserving surgery.  Control group: 58.6% of breast-conserving surgery.  (p = 0.089)  **DFS**  Not reported  **Changes in circulating levels of insulin and metabolites (analysis only PCR groups):**  Not reported to intervention groups. | |
|  | Lopez-Bonet, 2019 | 79 patients included in the intention-to-treat (ITT) population of the METTEN study  100% not obese (exclusion criteria: BMI>30)  100% nondiabetic  No data regarding: menopause status, physical activity, and metabolic syndrome. | **Phenotype**:  HER2  **Receptors**:  **ER/PgR+**  Arm A with metformin: 19 (50.0%)  Arm B control: 24 (58.5%)  **ER/PgR-:**  Arm A with metformin: 19 (50.0%)  Arm B control: 17 (41.5%)  **Stage**:  Stage II - III  **Treatment modality**:  neoadjuvant | **Interventions**:  Metformin 1.700 mg/day (850 mg BID) for 24 weeks concurrently with 12 cycles of weekly paclitaxel plus trastuzumab, followed by four cycles of 3-weekly fluorouracil, epirubicin, cyclophosphamide (FE75C) plus trastuzumab.  **Comparator**:  Only equivalent sequential chemotherapy plus trastuzumab (paclitaxel plus trastuzumab, followed by fluorouracil, epirubicin, cyclophosphamide plus trastuzumab). | | **Secondary:**  Ki67 index | | **Ki67** (analysis only non-pCR patients, n=14, baseline to sugery)**:**  Metformin group: decrease from 42.5% (Visual Analysis (VA))/34.5% (automated digital image analysis (ADIA) to 11% (VA)/11%(ADIA)), p = 0.025 (VA)/ 0.035 (ADIA).  Control group: decrease from 36.0%(VA)/ 38.5%(ADIA) to 28.5%(VA)/ 25%(ADIA), p = 0.293 (VA)/ 0.080(ADIA)    **Ki67** (analysis only non-pCR patients, change of category: high ≥ 20% versus low <20%)**:**  Metformin group: 57% (VA)/50% (ADIA) of high-Ki67 moved into the low-Ki67  Control group: 67%(VA)/80% (ADIA) of high-ki67 remained unchanged.  [p = 0.5210 (VA), p = 0.3582 (ADIA)]. | |
| Cuyàs, 2019 | 79 patients included in the intention-to-treat (ITT) population of the METTEN study  100% not obese (exclusion criteria: BMI>30)  BMI≥25 (overweight)  Non-pCR: 12 (38.7%)  pCR: 26 (54.2%)  Post  Non-pCR: 11 (35.5%)  pCR: 20 (41.7%)  Pre+Peri  Non-pCR: 20 (64.5%)  pCR: 28 (58.3%)  100% nondiabetic  No data regarding: physical activity, and metabolic syndrome. | **Phenotype**:  HER2  **Receptors**: **ER/PgR+**  **Non-pCR:** 21 (67.7%)  pCR: 22 (45.8%)  **ER/PgR-:**  **Non-pCR:** 10 (32.3%)  pCR: 26 (54.2%)  **SNP:**  Metformin group: [A/A= 17 (51,5%); A/C, C/C=16 (48,5%)];  Control group: [A/A=20 (54,1%); A/C, C/C=17 (45,9%)]  **Stage**:  Stage II - III  **Treatment modality**:  neoadjuvant | **Interventions**:  Metformin 1.700 mg/day (850 mg BID) for 24 weeks concurrently with 12 cycles of weekly paclitaxel plus trastuzumab, followed by four cycles of 3-weekly fluorouracil, epirubicin, cyclophosphamide (FE75C) plus trastuzumab.  **Comparator**:  Only equivalent sequential chemotherapy plus trastuzumab (paclitaxel plus trastuzumab, followed by fluorouracil, epirubicin, cyclophosphamide plus trastuzumab). | | **Secondary:**  C Allele of ataxia telangiectasia mutated (ATM) rs11212617 (if presence predict pCR) | | **C Allele of ATM rs11212617:**  **Relationship**  **between rs11212617 genotype and the ability of the treatment groups to achieve pCR:**  Adjusted OR genotype×arm: 20.53, 95%CI: 1.97 to 213.79, p = 0.011  **Relationship between rs11212617 C allele and pCR**  Metformin group: adjusted OR A/A (ref) vs A/C, C/C = 28.88, 95%CI: 2.20 to 378.73, p = 0.010  Control group: adjusted OR A/A (ref) vs A/C, C/C: 0.53, 95%IC: 0.11 to 2.50), p = 0.425 | |
| Cuyàs, 2019 | 68 patients included in the intention-to-treat (ITT) population of the METTEN study  100% not obese (exclusion criteria: BMI>30)  Overweight:  Metformin group: 15 (45.5%)  Control group: 19 (54.4%)  Postmenopausal  Metformin group: 13 (39.4%)  Control group: 15 (42.9%)  Premenopausal  Metformin group: 20 (60.6%)  Control group: 20 (57.1%)  100% nondiabetic  No data regarding: physical activity, and metabolic syndrome. | **Phenotype**:  HER2  **Receptors**:  **ER/PgR+**  Arm A with metformin: 18 (54.5%)  Arm B control: 19 (54.3%)  **ER/PgR-:**  Metformin group: 15 (45.5%)  Control group: 16 (45.7%)  **Stage**:  Stage II - III  **Treatment modality**:  neoadjuvant | **Interventions**:  Metformin 1.700 mg/day (850 mg BID) for 24 weeks concurrently with 12 cycles of weekly paclitaxel plus trastuzumab, followed by four cycles of 3-weekly fluorouracil, epirubicin, cyclophosphamide (FE75C) plus trastuzumab.  **Comparator**:  Only equivalent sequential chemotherapy plus trastuzumab (paclitaxel plus trastuzumab, followed by fluorouracil, epirubicin, cyclophosphamide plus trastuzumab). | | **Secondary:**  Serum metabolic profile [β-hydroxybutyrate (BHBA), α-ketoglutarate, cystathionine, taurine, betaine, choline, dimethylglycine, homocysteine, methionine, s-adenosyl methionine (SAM) and s-adenosyl homocysteine (SAH)] | | **Serum metabolic profile (median fold-change post *vs* pre-treatment):**  Differential impact between treatment arms: only BHBA (p = 0.038) and α-ketoglutarate (p = 0.029) reached statistical significance. Other metabolite levels were not significant.  **BHBA, α-ketoglutarate and homocysteine according to pCR status in metformin group** (fold-changes in serum levels post *vs* pre-treatment)**:**  BHBA (pCR *vs* non-pCR): p = 0.134  α-ketoglutarate (pCR *vs* non-pCR): p = 0.082  Homocysteine (pCR *vs* non-pCR): p = 0.047  **Relationship between levels of serum homocysteine (post - pre-treatment) and the ability of the treatment groups to achieve pCR:**  Adjusted OR follow-up homocysteine × group: 47.584, 95%CI: 1.60 to 1411.93, p = 0.026  **Relationship between homocysteine (higher levels, post - pre-treatment) and pCR**  Metformin group: adjusted OR = 6.614, 95%CI: 0.822 to 53.189, p = 0.076  Control group: adjusted OR = 0.144, 95%CI: 0.010 to 2.077, p = 0.155 | |
| Pimentel, 2019 | | 40 subjects were randomized (22 metformin group, 18 control group)  No data regarding: obesity, overweight, menopause status, physical activity, and metabolic syndrome.  100% nondiabetic | **Phenotype**:  Luminal, HER2, Triple negative  **Receptors**:  34 (85%) ER/PR+; 6 (15%) ER/PR-; 6 (15%)HER2+; 34 (85%)HER2-  **Stage**:  100% stage IV  **Treatment line:**  27 (67,5%) 1st line treatment; 7 (17,5 %) 2nd line treatment; 6 (15%) 3rd or + line treatment  **Treatment modality**: adjuvant and palliative | **Interventions**:  Metformin 1.700 mg/day (850 mg BID) plus standard chemotherapy. 1st-4th line chemotherapy (prespecified anthracycline, taxane, vinorelbine, platinum or capecitabine, with allowance for HER2 targeted treatment)  **Comparator**:  Placebo plus standard chemotherapy | | **Primary:**  PFS  **Secondary:**  OS, Response rates, Toxicity, (QoL) | | **PFS**:  Metformin group: 5.4 months  Control group: 6.3 months  Adjusted HR = 1.43 (95%CI: 0.68 to 3.02), 2-sided p = 0.35, 1-sided p = 0.83  **OS**:  Metformin group: 20.2 months  Control group: 24.2 months  Adjusted HR = 1.46 (95%CI: 0.68 to 3.13), 2-sided = 0.34, 1-sided p = 0.83  **Response Rates (partial response or stable disease):**  Metformin group: 12 patients (54.5%)  Control group: 7 patients (43.7%)  OR = 1.77 (95%CI: 0.45 to 6.99), 2-sided p = 0.41, 1-sided p = 0.21  **Adverse events**:  High grade (III or IV):  Metformin group: 7 patients (31.8%)  Control group: 10 patients (58.8%)  Low grade (I or II):  Metformin group: 15 patients (68.2%)  Control group: 6 patients (35.3%)  Gastrointestinal toxicity was the most common system organ class.  **QoL (Global Health Status - change from baseline to cycle 2)**:  Metformin group: -0.6 (standardized effect size for change over time)  Control group: 0.3 (standardized effect size for change over time)  Standardized effect size for difference between arms, cycle 2 scores = 0.1 | |
| NCIC CTG MA.32 | Goodwin, 2022 | 3649 patients;  Both sexes were eligible for study; 3643 women [99.8%])  No data regarding: obesity, overweight, physical activity, and metabolic syndrome.  2237 (61,3%) were postmenopausal. There are frequencies in the subpopulation according to HR status too.  100% nondiabetic people | **Phenotype**:  Luminal, HER2, Triple negative  **Receptors**:  **Status HR:**  2533 (69,4%) ER/PgR+;  1116 (30,6%) ER/PgR-;  **Status HER2:**  3029 (83,0%) **HER2-;**  620 (17,0%) HER2+;  **Frequencies in the subpopulation according to HR status**  **ER/PgR+ patients:**  429 (16,9%) HER2+  **ER/PgR- patients:**  191 (17,1%) HER2+  **Stage**:  Stages I – III  **Treatment modality**:  adjuvant | **Interventions**:  Patients receive 850mg of oral metformin twice daily (once daily in weeks 1-4). Treatment continues for up to 5 years in receptor positive (ER and/or PgR positive) subjects in the absence of disease progression or unacceptable toxicity. Standard adjuvant therapy (radiotherapy, chemotherapy, hormone, biologics).  **Comparator**:  Patients receive oral placebo twice daily (once daily in weeks 1-4). Treatment continues for up to 5 years in receptor positive (ER and/or PgR positive) subjects in the absence of disease progression or unacceptable toxicity.  Standard adjuvant therapy (radiotherapy, chemotherapy, hormone, biologics). | | **Primary:**  Invasive DFS  **Secondary:**  OS, distant relapse-free survival, breast cancer-free interval, new diabetes diagnosis, cardiovascular hospitalizations, quality of life, diet and physical activity | | **Invasive DFS (incidence rates)**  Group ER/PgR+  Metformin group: 2.78 per 100 patient-years  Control group: 2.74 per 100 patient-years  (HR = 1.01, 95% CI: 0.84 to 1.21, p = 0.93  Metformin effect on invasive disease–free survival did not differ by rs11212617 SNV status (pfor interaction = 0.97).  Group ER/PgR−  Metformin group: 3.58 per 100 patien-tyears  Control group: 3.60 per 100 patient-years  HR = 1.01, 95%CI: 0.79 to 1.30, p = 0.92  Metformin effect on invasive disease–free survival did  not differ by rs11212617 SNV status (p for interaction = 0.31).  Group ERBB2+  Metformin group: 1.93 events per 100 patient-years  Control group: 3.05 events per 100 patient-years  HR = 0.64, 95%CI: 0.43 to 0.95, p = 0.03)  Group ERBB2+ by rs11212617 SNV status  pfor interaction = 0.05  *Subgroup C, A/C genotype*:  Metformin group: 1.74 per 100 patient-years  Control group: 3.48 per 100 patient-years  HR = 0.51, 95%CI: 0.31 to 0.83, p= 0.007  *Subgroup AA genotype*:  Metformin group: 2.5 per 100 patient-years  Control group: 1.91 per 100 patient-years  (HR = 1.32, 95%CI: 0.58 to 2.96, p = 0.51)  Group ERBB2-  Metformin group: 3.24 events per 100 patient-years  Control group: 2.98 events per 100 patient-years  HR = 1.09, 95%CI: 0.93 to 1.28, p = 0.29  **OS**  Group ER/PgR+:  Metformin group: 1.46 deaths  per 100 patient-years  Control group: 1.32 deaths per 100 patient-years  HR = 1.10, 95%CI: 0.86 to 1.41, p = 0.47  Metformin effect on overall  survival did not differ by rs11212617 SNV status (p for interaction = 0.46)  Group ER/PgR-:  Metformin group: 1.91 deaths per 100 patient-years  Control group: 2.15 deaths per 100 patient-years  HR = 0.89, 95%CI: 0.64 to 1.23, p = 0.46  Group ERBB2+  Metformin group: 0.78 deaths per 100 patient-years  Control group: 1.43 deaths per 100 patient-years  HR = 0.54, 95%CI: 0.30 to 0.98, p = 0.04  Group ERBB2+ by rs11212617 SNV status  p for interaction = 0.02  *Subgroup C, A/C genotype*:  Metformin group: 0.69  deaths per 100 patient-years  Control group: 1.96 deaths per 100 patient-years  (HR = 0.35, 95%CI: 0.17 to 0.73, p = 0.003)  *Subgroup AA genotype*:  Metformin group: 1.18 deaths per 100 patient-years  Control group: 0.53 deaths per 100 patient-years  (HR = 2.15, 95%CI: 0.56 to 8.36, p = 0.26  Group ERBB2-  Metformin group: 1.76 deaths per 100 patient-years  Control group: 1.59 deaths per 100 patient-years  HR = 1.11, 95%CI, 0.90 to 1.36, p = 0.34  Metformin effect  on overall survival did not differ by rs11212617 SNV status (pfor interaction = 0.25).  **Distant recurrence–free survival:**  Group ER/PgR+:  Metformin group: 1.99 per 100 patient-years  Control group: 1.99 per 100 patient-years  HR = 0.99, 95%CI: 0.80 to 1.23, p = 0.94;  Group ER/PgR-:  Metformin group: 2.35 per 100 patient-years  Control group: 2.63 per 100 patient-years  HR = 0.90, 95%CI: 0.67 to 1.20, p = 0.46)  **Breast cancer–free interval:**  Group ER/PgR+:  Metformin group: 2.15 per 100 patient-years  Control group: 2.18 per 100 patient-years  HR = 0.98, 95%CI: 0.80 to 1.20; p = 0.87  Group ER/PgR-:  Metformin group: 2.75 per 100 patient-years  Control group: 3.14 per 100 patient-years  HR = 0.88, 95%CI: 0.67 to 1.16, p = 0.35)  **New diabetes diagnosis, cardiovascular hospitalizations, quality of life, diet and physical activity:**  Not reported | |
| Goodwin, 2021 | metabolic subpopulation: 2.915 patients (all available subjects with fasting blood at baseline and 6 months); metabolic SNP subpopulation: 2.747 subjects (SNP information available)  **Obesity:**  Overall (≥30) n(%): 1000 (34.3%)  **Overweight:**  Overall (≥25 and <30) n(%): 963 (33.03%)  100% nondiabetic people  No data regarding: menopause status, physical activity, and metabolic syndrome. | **Phenotype**:  Luminal, HER2, Triple negative  **Receptors**:  **Hormone receptor status**  ER/PgR-: 859 (29.5%)  ER/PgR+: 2056 (70,5%)  **HER2 status**  HER2-: 2417 (82.9%)  HER2+: 498 (17.1%)  **Stage**:  Stages I – III  **Treatment modality**:  adjuvant | **Interventions**:  Metformin 1.700 mg/day (850 mg BID) for 5 years, including a 4-week ramp-up of one caplet per day  **Comparator**:  Placebo | | **Secondary:**  Weight, BMI, glucose, insulin, HOMA, leptin, hsCRP (relative change from baseline  to six months) | | **Weight (Kg):**  Metformin group: -2%  Control group: +1%  p< 0.0001  Standardized ratio*: 0.97, 95%CI: 0.97 to 0.98, p<0.0001  **BMI (kg/m2):**  Metformin group: -2%  Control group: +1%  p< 0.0001  Standardized ratio*: 0.97, 95%CI: 0.97 to 0.98, p<0.0001  **Weight or BMI:**  Interactions for baseline Weight or BMI: p = 0.76  Interactions for baseline insulin: p = 0.16  Interactions for SNP genotype: p = 0.69  **Glucose (mmol/L):**  Metformin group: -2%  Control group: +1%  p< 0.0001  Standardized ratio*: 0.98, 95%CI: 0.97 to 0.99, p<0.0001  Interactions for baseline Weight or BMI: p = 0.94  Interactions for baseline insulin: p = 0.53  Interactions for SNP genotype: p = 0.21  **Insulin (pmol/L):**  Metformin group: -11%  Control group: +6%  Standardized ratio*: 0.85, 95%CI: 0.82 to 0.88, p<0.0001  Interactions for baseline Weight or BMI: p = 0.53  Interactions for baseline insulin: p = 0.19  Interactions for SNP genotype: p = 0.84  **HOMA:**  Metformin group: -10%  Control group: +11%  p< 0.0001  Standardized ratio*: 0.83, 95%CI: 0.79 to 0.87, p<0.0001  Interactions for baseline Weight or BMI: p = 0.86  Interactions for baseline insulin: p = 0.68  Interactions for SNP genotype: p = 0.59  **Leptin (ng/ml):**  Metformin group: -10%  Control group: +12%  p< 0.0001  Standardized ratio*: 0.80, 95%CI: 0.77 to 0.83, p<0.0001  Interactions for baseline Weight or BMI: p = 0.02  Interactions for baseline insulin: p = 0.13  Interactions for SNP genotype: p = 0.65  **hsCRP (μg/L):**  Metformin group: -9%  Control group: +10%  p< 0.0001  Standardized ratio*: 0.84, 95%CI: 0.78 to 0.80, p<0.0001  Interactions for baseline Weight or BMI: p = 0.93  Interactions for baseline insulin: p = 0.04  Interactions for SNP genotype: p = 0.74  There was no evidence that change in body size or blood variables differed in those receiving adjuvant endocrine therapy vs no (all interaction p ≥ 0.22)    * relative levels in the two arms (metformin/control) at 6 months standardized to remove the baseline differences in the variable, age and BMI | |
| Lohmann, 2017 | the first 492 patients with paired blood samples  100% nondiabetic people  No data regarding: obesity, overweight, menopause status, physical activity, and metabolic syndrome. | **Phenotype**:  Luminal, HER2, Triple negative  **Receptors**:  **Stage**:  Stages I – III  **Treatment modality**: adjuvant | **Interventions**:  Metformin 1.700 mg/day (850 mg BID) for 5 years, including a 4-week ramp-up of one caplet per day  **Comparator**:  Placebo | | **Secondary:**  Vitamin B12, methylmalonic acid (MMA)* and homocysteine* (change from baseline to six months).  *analyzed in patients with vitamin B12 levels below 222 pmol/L at baseline or six months. | | **Vitamin B12 (pmol/L)** (median change)**:**  Metformin group: -51 [interquartile range (IQR)]: 6, -182  Control group: 0 (IQR: -61, +65).  p< 0.001  **MMA (lmol/L)** (median at six months)**:**  Metformin group: 0.15 (IQR: 0.12, 0.2)  Control group: 0.15 (IQR: 0.11, 0.2)  p = 0.70  **Homocysteine (lmol/L)** (median at six months)**:**  Metformin group: 9.5 (IQR: 8.5, 12.5)  Control group: 9 (IQR: 8, 12)  p = 0.57 | |
|  | Goodwin, 2021 | CA 15–3 population (n=2708)  100% nondiabetic people  No data regarding: obesity, overweight, menopause status, physical activity, and metabolic syndrome. | **Phenotype**:  Luminal, HER2, Triple negative  **Receptors**:  **Hormone receptor status**  ER/PgR-: 795 (29,4%)  ER/PgR+: 1913 (70,6%)  **HER2 status**  HER2-: 2244 (82,9%)  HER2+: 464 (17,1%)  **Stage**:  Stages I – III  **Treatment modality**: adjuvant | **Interventions**:  Metformin 1.700 mg/day (850 mg BID) for 5 years, including a 4-week ramp-up of one caplet per day  **Comparator**:  Placebo | | **Secondary:**  CA 15–3 (change from baseline to six months). | | **CA 15–3:**  Metformin group: -7.7%  Control group: -2.0%  p<0.001  Metformin/ control standardized ratio (after correcting for differences in baseline CA 15–3, age, and  BMI): 0.94 (95%CI: 0.92 to 0.96, p<0.001)  This outcome was not affected differentially depending on baseline stage (T-Stage clinical: p = 0.73; N-Stage clinical: p = 0.17; T-Stage pathologic: p = 0.12; N-Stage pathologic: p = 0.33), receptor status (ER/PgR: p = 0.35; HER2: p = 0.14) , adjuvant treatment (hormones: p = 0.76; chemotherapy: p = 0.52; trastuzumab: p = 0.15), SNP status (p = 0.16), BMI (p = 0.87), or insulin level (p = 0.11). | |
| Pimentel, 2021 | 312 patients  100% postmenopausal  100% nondiabetic women  No data regarding: obesity, overweight, physical activity, and metabolic syndrome. | **Phenotype**:  Luminal, HER2, Triple negative  **Receptors**:  **Hormone receptor status**  ER/PgR-: 312 (100,0%)  ER/PgR+: 0 (0,0%)  **HER2 status**  HER2+: 59 (18,9%)  HER2-: 253 (81,1%)  **Stage**:  Stages I – III  **Treatment modality**: adjuvant | **Interventions**:  Metformin 1.700 mg/day (850 mg BID) for 5 years, including a 4-week ramp-up of one caplet per day  **Comparator**:  Placebo | | **Secondary:**  Estradiol, SHBG and bioavailable testosterone (change from baseline to six months)**;** | | **Estradiol (pmol/L, median change):**  Metformin group: -5.7 (Q1-Q3: -18.6, 0)  Control group: 0 (Q1-Q3: -12.6, 14.7)  p<0.001  *Reduction in estradiol in metformin vs placebo:*  -Adjusted for baseline BMI and BMI change: 25.7%, 95%CI: 13.2% to 36.4%)  -Adjusted for change in insulin: 30.1%, 95%CI: 18.7% to 39.8%  Reduction in estradiol associated with the metformin group was not affected by the C allele of the SNP rs11212617  **SHBG (nmol/L, median change)**  Metformin group: -5.9 (Q1-Q3: -15.6, 3.0)  Control group: -5.9 (Q1-Q3: -17.4, 1.5)  P = 0.43  **Bioavailable testosterone (nmol/L, median change)**  Metformin group: 0 (Q1-Q3: -0.01, 0.01)  Control group: 0 (Q1-Q3: -0.01, 0.02)  P = 0.24 | |
| EudraCT number 2008-004912-10  ISRCTN16493703 | Bonanni, 2012 | 200 patients  **Obesity:**  26 (13%)  **Overweight:**  56 (28%)  **Menopause status:**  Premenopausal: 100 (50%)  Perimenopausal: 12 (6%)  Postmenopausal: 88 (44%)  **DM:**  100% nondiabetic women  **Metabolic syndrome:**  Yes: 51 (25,50%)  No: 146 (73%)  Unknown: 3 (1,5%)  No data regarding physical activity | **Phenotype**:  Luminal, HER2, Triple negative  **Receptors**:  ER+ pretreatment: 173 (86,5%)  PgR+ pretreatment: 142 (71%)  HER2+: 22 (11%)  **Stage**:  stage I to IIa  **Treatment modality**: neoadjuvant | **Interventions**:  days 1 to 3: 850-mg once  daily to adapt to gastrointestinal symptoms; days 4 through 28: two 850-mg tablets after dinner (1700mg daily)  **Comparator**:  days 1 to 3: placebo once  daily to adapt to gastrointestinal symptoms; days 4 through 28: two tablets of placebo after dinner. | | **Primary:**  Ki67  **Secondary:**  Insulin, glucose, CRP, total cholesterol | | **Ki67 (Proportional change*)**  *Overall*  Proportional Change: 4.0% (95%CI: -5.6 to 14.4, p interaction = 0.4)  Group HOMA index (proportional change), per protocol  HOMA index ≤ 2.8: 11.1% (95% CI, -0.6 to 24.2)  HOMA index ˃ 2.8: -10.5% (95%CI: -26.1 to 8.4)  p interaction = 0.045  Group BMI (proportional change), per protocol  ≤ 27 kg/m2 (75th percentile): 8.2% (95%CI: -3.4 to 21.3)  ˃ 27 kg/m2: -8.0% (95%IC: -23.2 to 10.3)  p interaction = 0.143  Group Waist/hip girth ratio (proportional change)  ≤ 0.88 (75th percentile): 9.9% (95%CI: -1.8 to 23.2)  ˃ 0.88: -11.2% (95%CI: -26.3 to 6.9)  p interaction = 0.058  Group Alcohol consumption (proportional change)  No: 10.3% (95%CI: 0.8 to -22.6)  Yes: -20.2% (95%CI: -35.6 to -0.9)  p interaction = 0.005  Group C-reactive protein (proportional change)  ≤ 2.69 mg/L (75th percentile): 9.4 (95%CI: -2.7 to 23.1)  ˃ 2.69 mg/L: -11.3 (95%CI: -24.1 to 3.7)  p interaction = 0.080  *Subgroup Luminal B tumors*  Proportional Change: -1.75% (95% CI: -11.4 to 8.9, p = 0.7)  *Subgroup Luminal B tumors by HOMA index (proportional change)*  HOMA index ≤ 2.8: 5.01% (95%CI: -7.2 to 18.8, p = 0.4)  HOMA index ˃ 2.8: -16.0% (95%CI, -30.9 to 2.1, p = 0.008)  p interaction = 0.05  **Insulin (mU/L)**  Proportional change: 2.3% (95%CI: -10.6 to 17.1; p = 0.739)  Group BMI (proportional change)  ≤ 27 kg/m2: 8.3% (95%CI: -4.6 to 22.9)  ˃ 27 kg/m2: -13.8% (95%CI: -42.8 to 29.9)  p interaction = 0.092  **Glucose (mg/dL)**  Proportional change: -1.8% (95%CI: -4.7 to 1.3, p = 0.254)  Group BMI (proportional change),  ≤ 27 kg/m2: 0.04% (95%CI: -3.0 to 3.2)  ˃ 27 kg/m2: -6.8 (95%CI: -14.0 to 1.0)  p interaction = 0.015  **CRP (mg/L)**  Proportional change: -19.9% (95%CI: -34.3 to -2.2; p = 0.029)  Group BMI (proportional change),  ≤ 27 kg/m2: -18.7 (95%CI: -35.1 to 1.9)  ˃ 27 kg/m2: -23.6 (95%CI: -51.4 to 20.1)  p interaction = 0.7  **Total cholesterol (mg/dL)**  Proportional change: -5.3% (95%CI: -7.8 to -2.7, p< 0.001  Group BMI (proportional change),  ≤ 27 kg/m2: -4.5 (95%CI: -7.2 to -1.6)  ˃ 27 kg/m2: -7.9 (95%CI: -13.6 to -1.8)  p interaction = 0.191  *[100 x exp (mean metformin post-treatment - mean placebo  post-treatment)/(mean placebo post-treatment)] | |
| Cazzaniga, 2013 | 100 patients  100% nondiabetic women  No data regarding: obesity, overweight, menopause status, physical activity, and metabolic syndrome. | **Phenotype**:  Luminal, HER2, Triple negative  **Receptors**:  Luminal A: 22 (22%)  Luminal B: 55 (55%)  HER2+: 14 (14%)  TNBC: 9 (9%)  **Stage**:  stage I to IIIa  **Treatment modality**: neoadjuvant | **Interventions**:  days 1 to 3: 850-mg once  daily to adapt to gastrointestinal symptoms; days 4 through 28: two 850-mg tablets after dinner (1700mg daily)  **Comparator**:  days 1 to 3: placebo once  daily to adapt to gastrointestinal symptoms; days 4 through 28: two tablets of placebo after dinner. | | **Secondary:**  Apoptotic cell nuclei by terminal deoxynucleotidyl transferase dUTP nick end labelling (TUNEL) | | **Apoptotic cell nuclei by TUNEL**  *Median difference surgery-biopsy levels:*  Metformin group: +4% (IQR: 2-12)  Control group: +2% (IQR: 0-8)  *Median TUNEL levels at*  *surgery:*  Metformin group: 10% (IQR: 4–20)  Control group: 8% (IQR: 3–15)  p adjusted = 0.2  HOMA index  *Median difference surgery-biopsy levels*  HOMA index ˂ 2.8  Metformin group: +4% (IQR: 2–14)  Control group: +2% (IQR: 0-7)  HOMA index ≥ 2.8:  Metformin group: +2% (IQR: 0–6)  Control group: +5% (IQR: 0–15)  p interaction (HOMA and treatment) = 0.1  *Median TUNEL levels at*  *surgery:*  HOMA index ˂ 2.8  Metformin group: 10% (IQR: 6–22)  Control group: 6% (IQR: 3–12)  p = 0.048  HOMA index ≥ 2.8:  Metformin group: 6% (IQR: 4–10)  Control group: 9% (IQR: 6–18)  P = 0.3 | |
| DeCensi, 2014 | 200 patients  100% nondiabetic women  No data regarding: obesity, overweight, menopause status, physical activity, and metabolic syndrome. | **Phenotype**:  NI  **Receptors**:  11 % had HER2-positive tumors  **Stage**:  stage I to IIa  **Treatment modality**: neoadjuvant | **Interventions**:  days 1 to 3: 850-mg once  daily to adapt to gastrointestinal symptoms; days 4 through 28: two 850-mg tablets after dinner (1700mg daily)  **Comparator**:  days 1 to 3: placebo once  daily to adapt to gastrointestinal symptoms; days 4 through 28: two tablets of placebo after dinner. | | **Secondary:**  Effects of metformin according to BMI, glucose, insulin, HOMA index, C-peptide, CRP, IGFBP-1, IGFBP-3, IGF-I, free IGF-I, adiponectin and tumor subtype (difference surgery-baseline) | | **Weight (kg)**  Treatment effect (mean)*: -0.09 (95%CI: -0.85 to 0.67, p = 0.8)  **BMI (kg/m2)**  Treatment effect (mean)*: -0.05 (95%CI: -0.35 to 0.25, p = 0.7)  **Glucose (mmol/L)**  Treatment effect (mean)*: -0.64 (95%CI: -3.78 to 2.49, p = 0.7)  **Insulin (mU/L)**  Treatment effect (mean)*: -0.75 (95%CI: -3.36 to 1.85, p = 0.6)  **HOMA index**  Treatment effect (mean)*: -0.27 (95%CI -1.19 to 0.65, p = 0.6)  **C-peptide (ng/mL)**  Treatment effect (mean)*: -0.04 (95%CI: -0.25 to 0.17, p = 0.7)  **hs-CRP (mg/L)**  Treatment effect (mean)*: -0.47 (95%CI: -1.06 to 0.12, p = 0.1)  Metformin decreased hs-CRP levels in women with BMI˃25 (p = 0.05)  **IGFBP-1 (ng/mL)**  Treatment effect (mean)*: -0.10 (95%CI: -0.98 to 0.78, p = 0.8)  Metformin increased IGFBP-1 in women with BMI˃25 (p = 0.09)  **IGFBP-3 (lg/mL)**  Treatment effect (mean)*: 0.03 (95%CI: -0.10 to 0.15, p = 0.7)  **IGF-I (ng/mL)**  Treatment effect (mean)*: -3.1 (95%CI: -10.0 to 3.7, p = 0.4)  **Free IGF-I**  Treatment effect (mean)*: -0.006 (95%CI: -0.01 to 0.002, p = 0.1  **Adiponectin (ng/Ml)**  Treatment effect (mean)*: -0.64 (95%CI: -1.17 to -0.12, p = 0.02)  **Ki-67 (%)**  Treatment effect (mean)*: 0.30 (95%CI: -1.93 to 2.53, p = 0.8)  Group HOMA index (Ki67 change-difference between endpoint surgery and baseline biopsy)  HOMA index ≤2.8: no association (p = 0.68)  HOMA index >2.8: greater decrease of Ki67 (p = 0.04)  p interaction treatment*HOMA = 0.07  Group HER2 status (Ki67 change-difference between endpoint surgery and baseline biopsy)  HER2+: -4.6%  HER2-: 0.9%  p interaction = 0.076  Group hs-CRP  p interaction= 0.02  Group IGFBP-3  p interaction = 0.04  Group IGFBP-1  p interaction = 0.02  *adjusted for the biomarker level at baseline, BMI and age | |
| DeCensi, 2015 | 142 patients  **Obesity:**  10 (7%)  **Overweight:**  46 (32,4%)  **Menopause status:**  Premenopausal: 76 (53,52%)  Perimenopausal: 7 (4,93%)  Postmenopausal: 59 (41,55%)  **DM:**  100% nondiabetic women  No data regarding: metabolic syndrome and physical activity | **Phenotype**:  Luminal, HER2, Triple negative  **Receptors**:  ER+ posttreatment: 126 (88,7%)  PgR+ posttreatment: 110 (77,5%)  HER2+ posttreatment: 22 (15,5%)  **Stage**:  stage I to IIa  **Treatment modality**: neoadjuvant | **Interventions**:  days 1 to 3: 850-mg once daily to adapt to gastrointestinal symptoms; days 4 through 28: two 850-mg tablets after dinner (1700mg daily)  **Comparator**:  days 1 to 3: placebo once daily to adapt to gastrointestinal symptoms; days 4 through 28: two tablets of placebo after dinner. | | **Coprimary:**  Ki67 in adjacent ductal carcinoma in situ (DCIS), lobular carcinoma in situ (LCIS) and ductal hyperplasia | | **Ki67:**  Group Posttreatment in DCIS (Median)  Metformin group: 12 (IQR: 8–20)  Control group: 10 (IQR: 7–24)  p = 0.9  *Subgroup DCIS grade 3* (Median)  Metformin group: 33 (25–55)  Control group: 40 (32–40)  p = 0.2  p interaction = 0.2  *Subgroup DCIS grade 1/2* (Median)  Metformin group: 10 (7–16)  Control group: 10 (6–17)  p = 0.9  *Subgroup DCIS HER2+* (Median)  Metformin group: 22 (11–32)  Control group: 35 (30–40)  p = 0.06  p interaction = 0.04  *Subgroup DCIS HER2-* (Median)  Metformin group: 16 (10–20)  Control group: 17 (8–26)  p = 0.7  *DCIS ER+/HER2+*  Metformin group: 12 (7–18)  Control group: 32 (27–42)  p = 0.004  p interaction = 0.001  *Subgroup DCIS ER+/HER2-*  Metformin group: 16 (10–20)  Control group: 15 (8–22)  p = 0.8  *Subgroup DCIS ER+/PR+/HER2+*  Metformin group: 18 (12–18)  Control group: 32 (24–44)  p = 0.02  p interaction = 0.05  *Subgroup DCIS ER+/PR+/HER2-*  Metformin group: 16 (10–20)  Control group: 12 (8–20)  p = 0.6  *Subgroup DCIS by HOMA*  p interaction = 0.7  *Subgroup HER2+/HOMA<2.8*  Metformin group: 26.5 (18–  30.5)  Control group: 32 (32–40)  *Subgroup HER2+/HOMA≥2.8*  Metformin group: 7  (2–71)  Control group: 38 (30–40)  p = 0.3  Group Posttreatment in LCIS (Median)  Metformin group: 15 (IQR: 5-15)  Control group: 5 (IQR: 4–6)  p = 0.1  Group Posttreatment in ductal hyperplasia (Median)  Metformin group: 3 (IQR: 1-4)  Control group: 3 (IQR: 1–4)  p = 0.5  *Subgroup Waist/hip girth ratio*  There was a lower proliferation fraction in women with abdominal adiposity (waist/hip girth ratio > 0.85) in the metformin group (p interaction = 0.05) | |
| **Studies with results published only in the form of abstracts** | | | | | | | | | |
| Arce-Salinas, 2016 | | 48 women were included, 28 were assigned to the experimental group and 20 in the control group.  Obesity rate was 46.2% (metformin group) and 47.1% (placebo group) for each treatment arm.  100% nondiabetic  Metabolic syndrome was more prevalent in experimental arm 61.5% (metformin group) vs 52.9% (placebo group).  No data regarding: menopause status and physical activity. | **Phenotype**:  Luminal = 48 (100%)  **Receptors**:  ER/PR + HER2- (100%)  **Stage**:  Stage III: 48 (100%)  **Treatment Modality**: neoadjuvant | **Interventions**:  Metformin 850 mg PO q12H with NeoCT  **Comparator**:  Placebo with NeoCT | | **Primary:**  pCR (assessed after 24 weeks of treatment)  **Secondary:**  Safety analysis, assess clinical response and to correlate serum levels of insulin, protein C and HbA1 with clinical and pathologic response | **pCR:**  Metformin group: 26.9%  Control group: 5.9%  p = 0.22  **Safety analysis**: No significant toxicity was associated with metformin.  No information for the others secondary outcomes. | | |
| Azazy, 2020 | | 60 participants (30 in each arm)  No data regarding: obesity, overweight, menopause status, physical activity, and metabolic syndrome.  100% nondiabetic | **Phenotype**:  NI  **Receptors**:  NI  **Stage**:  Stage II - III  **Treatment Modality**: neoadjuvant | **Interventions**:  Metformin 1.700mg/day (850 mg bid) starting with neoadjuvant chemotherapy (fluorouracil, epirubicin, cyclophosphamide (FEC) then docetaxel ± trastuzumab)  **Comparator**:  Neoadjuvant chemotherapy alone ((FEC) then docetaxel ± trastuzumab) | | **Primary:**  pCR and pathological partial response (pPR).  **Secondary:**  Toxicity | **pCR and pPR:**  There was a significant difference between metformin and control groups (p = 0.03). pCR was higher in metformin group, but didn’t reach significance due to the small sample size (p = 0.09).  There was more pronounced response in the Luminal B subtype (p = 0.03) and in grade II tumours (p = 0.03).  **Toxicity:**  There was no significant difference in overall toxicity or ≥ grade 3 adverse events between both groups | | |
| Sadighi, 2016 | | 45 participants (25 metformin group; 20 control group)  No data regarding: obesity, overweight, menopause status, physical activity, and metabolic syndrome.  100% nondiabetic | **Phenotype**:  NI  **Receptors**:  NI  **Stage**:  NI  **Treatment Modality**: neoadjuvant | **Interventions**:  Metformin (1500mg/day) was prescribed to intervention group from pathology report to the night before surgery.  **Comparator**:  Patients with the same inclusion criteria who did not receive any drug. | | **Primary:**  Ki67  **Secondary:**  Toxicity | **Ki67:**  Metformin group: Decrease of median from 35.14 to 29.6  Control group: Increase of median from 24.5 to 30.6.  Both results were statistically significant.  *HOMA*  There was a correlation between metabolic factor of HOMA score and changes in Ki67  **Toxicity:**  Although mild gastrointestinal symptoms were seen in 30% of cases, generally patients tolerated metformin very well. | | |
| IBIS 3 Trial  (**Feasibility study**)[[1]](#footnote-1)  (Oke, 2017) | | Planned number of subjects to be included in the whole clinical trial: 300 patients;  **Total final enrolment**: 89  No data regarding: obesity, overweight, physical activity, and metabolic syndrome.  100% postmenopausal  100% nondiabetic women | **Phenotype**:  NI  **Receptors**:  ER+  **Stage**:  NI  **Treatment Modality**: prevention of recurrence after end of cancer treatment | **Interventions**: Aromatase inhibitor (anastrozole, letrozole or examestane) and/or metformin (1700 mg/day) and/or zoledronic acid  2x2x2 factorial design  **Comparator**:  Standard care (No investigational medicinal product assigned in this arm) | | **Primary**:  To determine acceptability and feasibility of recruitment, recruitment rate and number of sites required for main trial investigating prevention of late recurrence with an aromatase inhibitor and/or metformin and/or zoledronic acid or standard care (no treatment).  **Secondary**:  To determine reasons for non-participation / drop-outs and address these for main trial;  To evaluate treatment adherence and reasons for stopping;  To determine reasons for non-adherence and address for main trial;  To assess the use of recruiting through GP surgeries local to sites via the PCRN/LCRN;  To investigate feasibility of the use of email for data collection of PROs from patients;  To assess acceptability of investigations for main trial. | Overall, only 5% GPs (?) agreed to participate and only 23 of 800 (3%) subsequently responded to the survey.  The main reasons identified for nonparticipation were lack of time/resources to carry out database search (61%) and/or review medical records to confirm eligibility (48%), request coming at a busy time (9%) e.g. Calendar or financial year-end, and insufficient funding (26%). | | |

ADIA: Automated digital image analysis; ATM:Ataxia telangiectasia mutated; BCR: Breast Conservative Rate; BDI: Beck Depression Inventory; BHBA: β-hydroxybutyrate; BMI: Body Mass Index; CA15-3: Cancer Antigen 15-3; CBR: Clinical Benefit Rate; CBS: Conservative breast surgery; cCR: Complete Clinical Response; CI: confidence interval; cPR: Partial Clinical Response; CRP: C-reactive protein; CRR: Clinical Response Rate; cSD: Clinical Stable Disease; CT: Chemotherapy treatment; CTC: Circulating tumor cells; DCIS: Ductal carcinoma in situ; DLT: Dose limiting toxicity; DFS: Disease-free survival; eGFR: Glomerular Filtration Rate; ER/PgR: Estrogen receptor and/or progesterone receptor; ER: Estrogen receptor; ET: Endometrial Thickness; FBG: Fasting blood glucose; HbA1c: Glycated hemoglobin; HDL: High-density lipoprotein; HOMA-IR: Homeostasis Model Assessment of Insulin Resistance; HR: Hazard Ratio; hs-CRP: High sensitivity CRP; HT: Hormonal treatment; IGF: Insulin-like Growth Factor; IGFBP: Insulin-like Growth Factor Binding Protein; IQR: Interquartile range; IL-6: Interleukin 6; IGF-1R: Insulin-like growth factor-1 receptor; LCIS: Lobular carcinoma in situ; LDL: Low-density lipoprotein; MMA: Methylmalonic acid; MRM: Modified radical mastectomy; OR: Odds Ratio; ORR: Objective Response Rate; OS: Overall survival; pCR: Pathological complete response; pPR: Pathological partial response

PFS: Progression-free survival.

1. IBIS 3 Trial is a feasibility study which results were published in a conference abstract (Oke, 2017) and [European Union](https://www.ema.europa.eu/en/glossary/european-union-clinical-trials-register) Clinical Trials Register. [↑](#footnote-ref-1)
